# Supplementary material
Source: PubMed Central journal article supplement (PMC4415623)

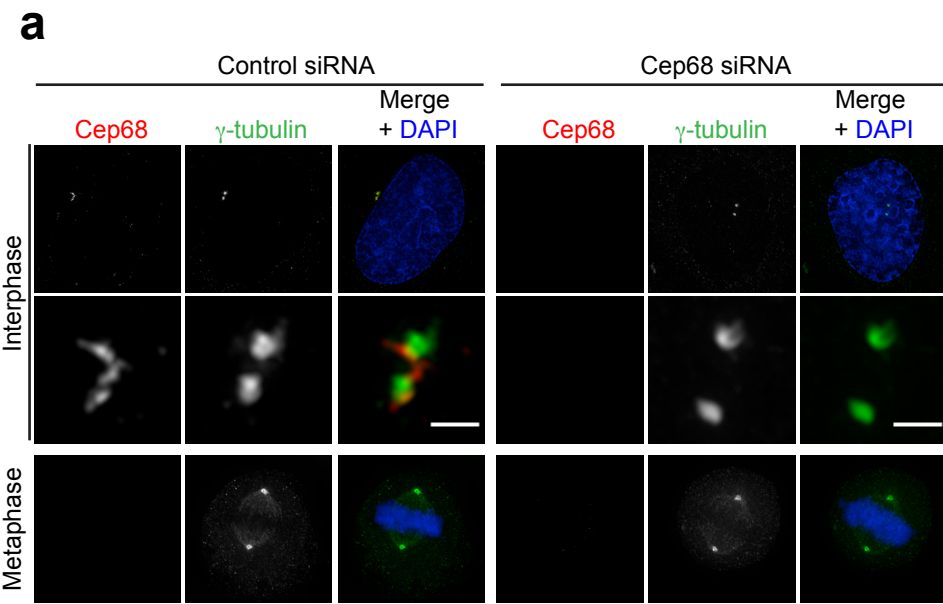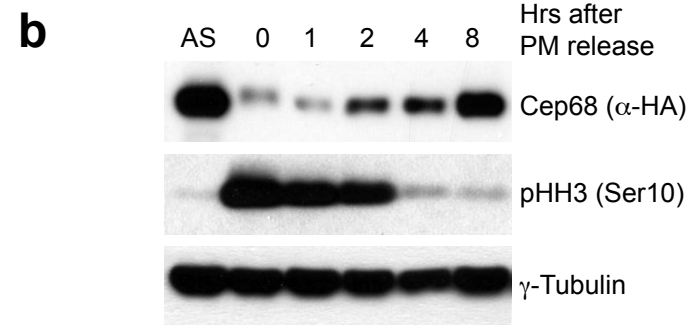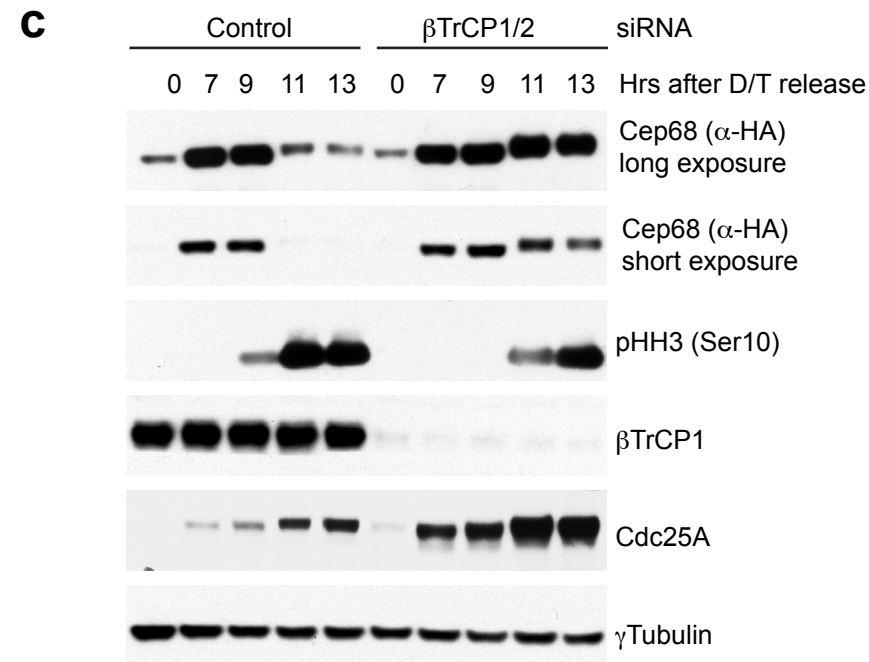

**d**

| Protein              | #Spectra | #Peptides | dNSAF    |
|----------------------|----------|-----------|----------|
| Cep68                | 5900     | 122       | 0.136    |
| $\beta$ TrCP2/Fbxw11 | 9        | 1         | 0.0003   |
| Cul1                 | 3        | 1         | 0.00007  |
| Skp1                 | 9        | 2         | 0.000097 |
| Cep215/Cdk5RAP2      | 5        | 3         | 0.00005  |
| Pericentrin/PCNT     | 9        | 4         | 0.00005  |

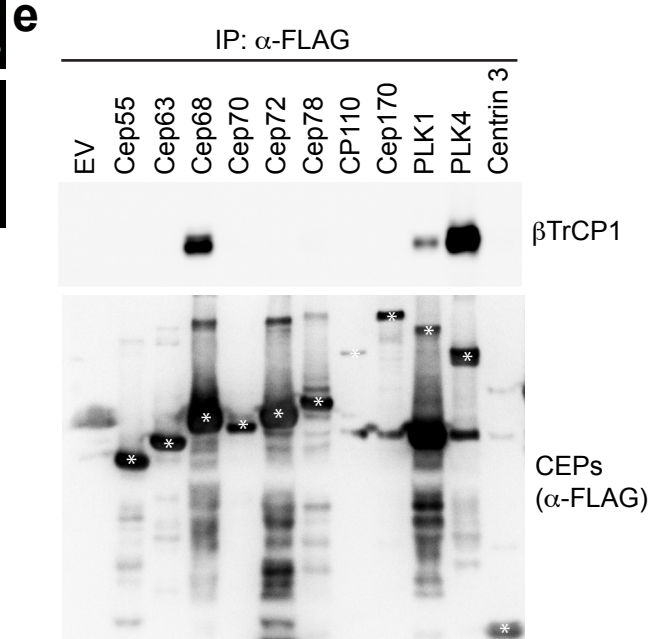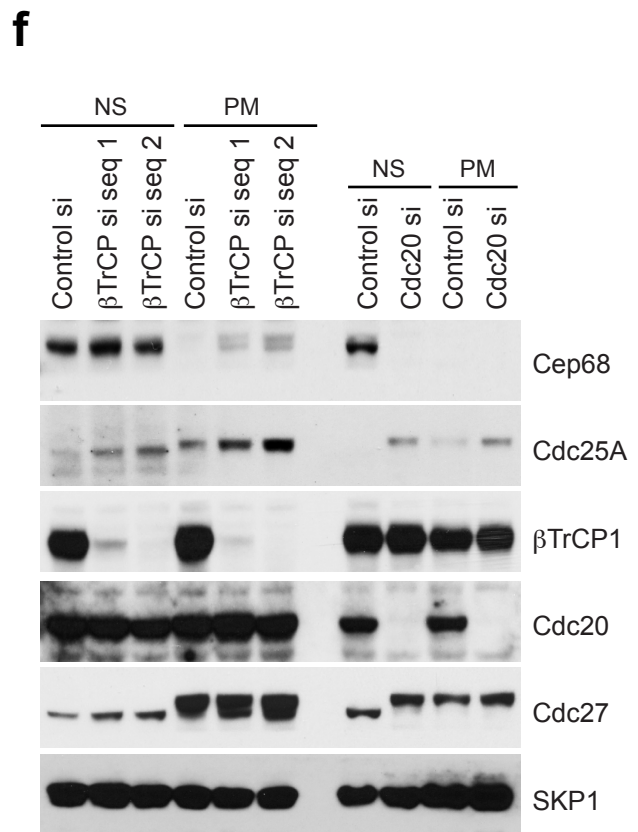

**a**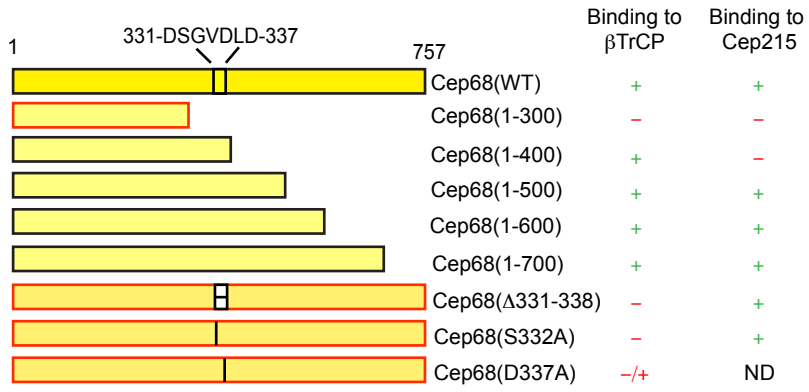**b**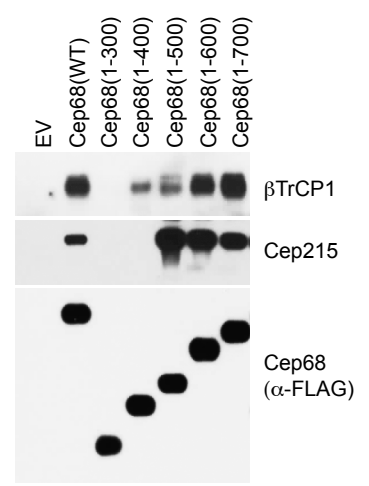**c**

**$\beta$ TrCP Binding sites**

|                                    |      |                                 |      |
|------------------------------------|------|---------------------------------|------|
| $\beta$ Catenin (H. Sapiens)       | 29   | SYL <b>DSG</b> IHSGAT           | 40   |
| I $\kappa$ B $\alpha$ (H. Sapiens) | 28   | DRH <b>DSGLD</b> SMKD           | 39   |
| Emil (H. Sapiens)                  | 141  | LYE <b>DSGYS</b> SFSL           | 152  |
| REST (H. Sapiens)                  | 1005 | IDE <b>DEGIH</b> SHHEG          | 1016 |
| Cdc25A (H. Sapiens)                | 212  | SDE <b>DDGFV</b> DLDD           | 223  |
| Cdc25B (H. Sapiens)                | 251  | TEE <b>DDGFV</b> DILE           | 262  |
| Wee1 (H. Sapiens)                  | 114  | SWE <b>EEGFG</b> SSSP           | 125  |
| PDCD4 (H. Sapiens)                 | 67   | SSR <b>DSGRGD</b> SVSD          | 79   |
| p105 (H. Sapiens)                  | 923  | SVC <b>DSGVET</b> SFRK          | 935  |
| ATF4 (H. Sapiens)                  | 215  | SDN <b>DSGICM</b> SPES          | 227  |
| Cep68 (G. Gallus)                  | 55   | EPLFH <b>DSGV</b> LDLSFSLSPGPT  | 75   |
| Cep68 (M. Muscularus)              | 309  | EPVL <b>QDSGV</b> LDLSLSVSPAST  | 329  |
| Cep68 (R. Norvegicus)              | 306  | DPVM <b>QDSGV</b> LDLSFVSVPAST  | 326  |
| Cep68 (C. Lupus)                   | 316  | DPLL <b>QDSGV</b> LDLSFVSVPAST  | 336  |
| Cep68 (B. Taurus)                  | 325  | EPVL <b>QDSG</b> IDLDLSFVSVPAST | 345  |
| Cep68 (H. Sapiens)                 | 326  | DPVL <b>QDSGV</b> LDLSFVSVPAST  | 346  |
| Cep68 (P. Troglodytes)             | 326  | DPVL <b>QDSGV</b> LDLSFVSVPAST  | 346  |

**d**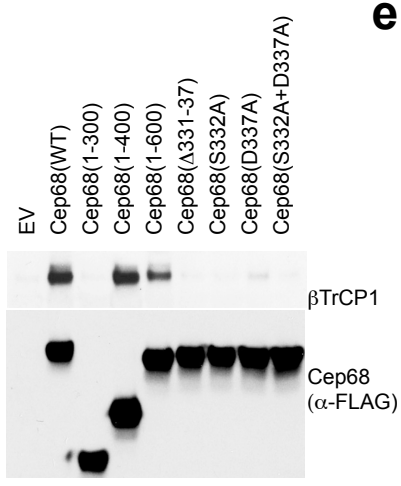**e**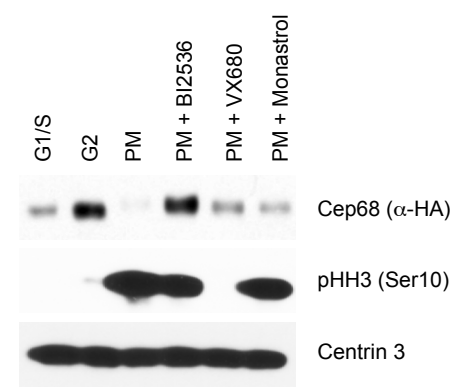**f**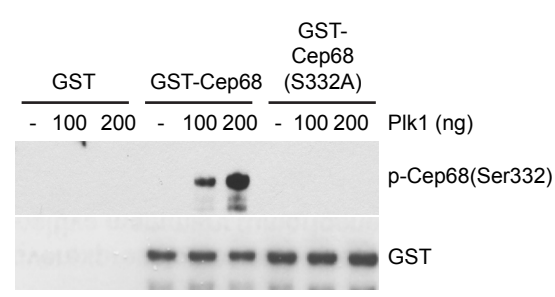**g**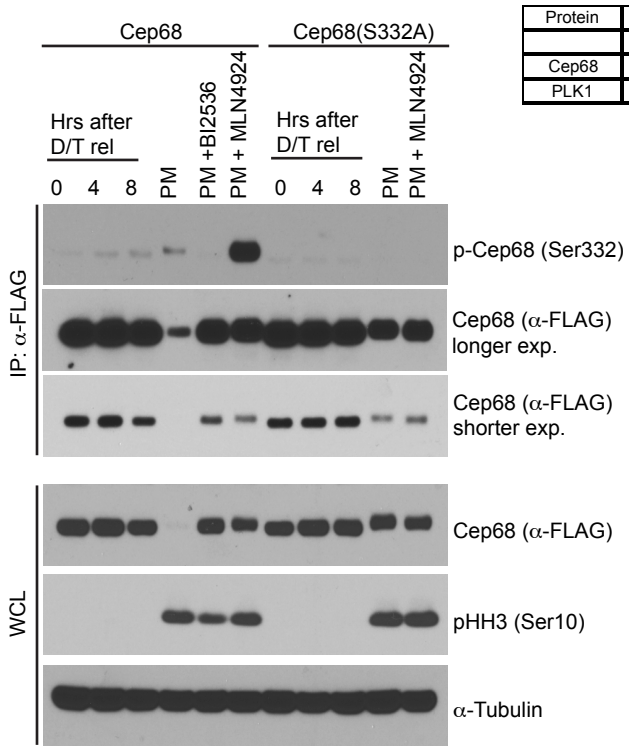**h**

| Protein | Untreated |       | PLK inhibition |        |
|---------|-----------|-------|----------------|--------|
|         | #Spectra  | dNSAF | #Spectra       | dNSAF  |
| Cep68   | 5900      | 0.136 | 7520           | 0.116  |
| PLK1    | 0         | 0     | 34             | 0.0006 |

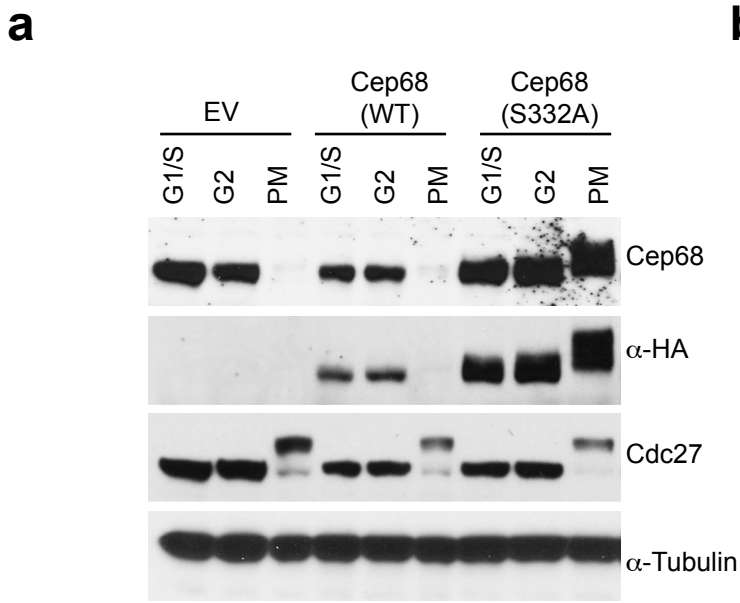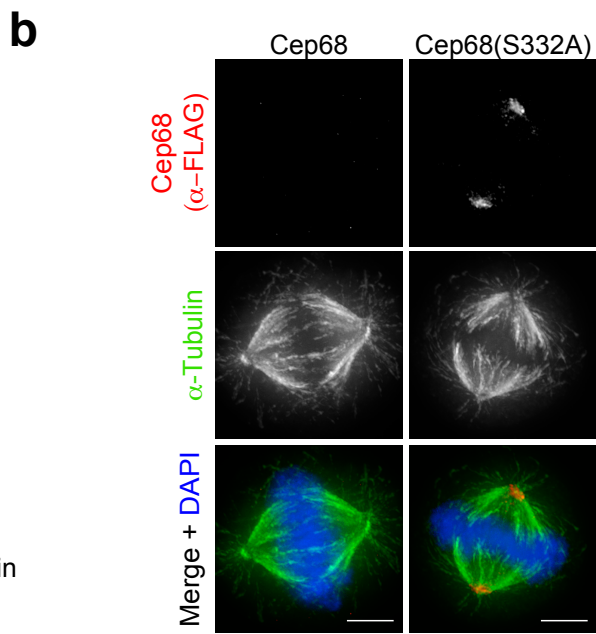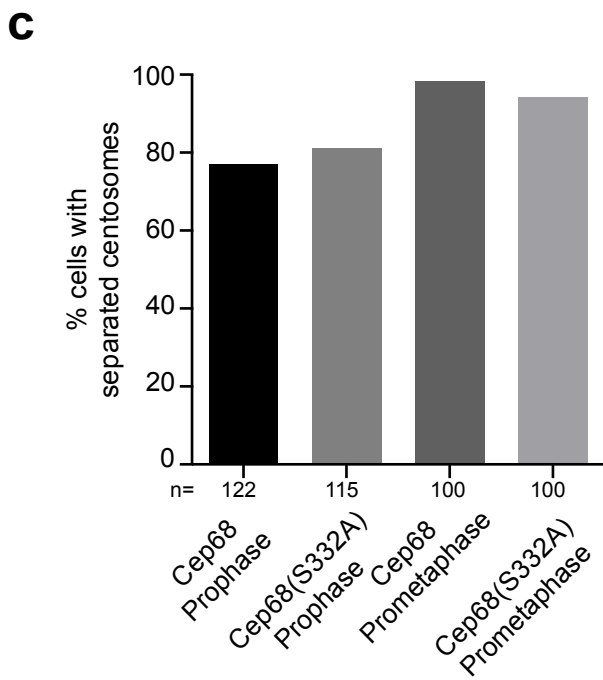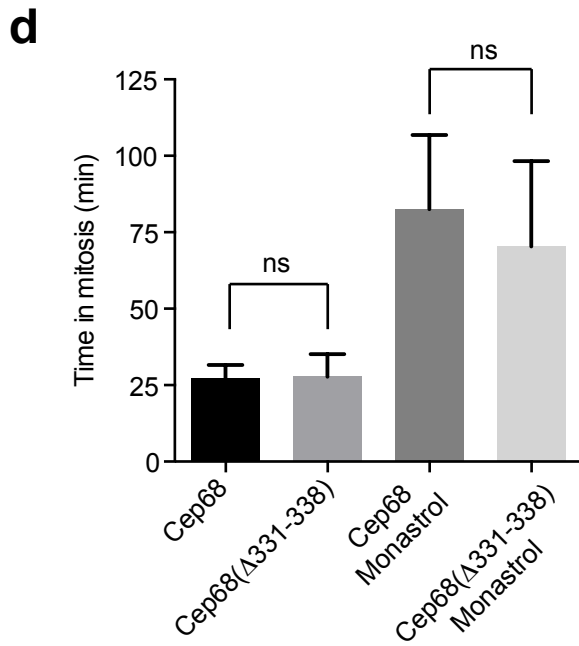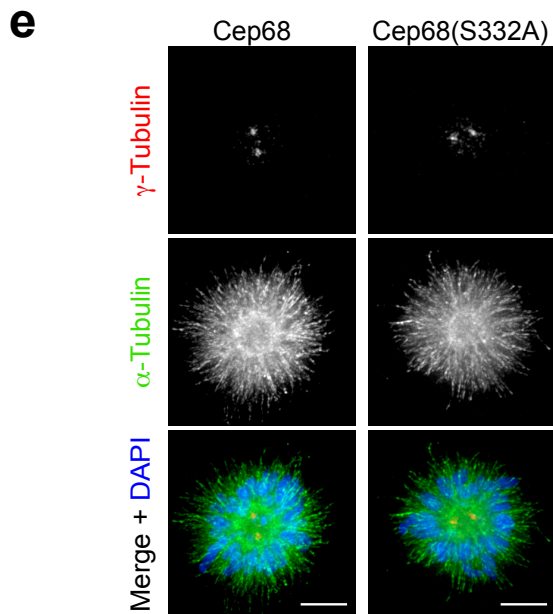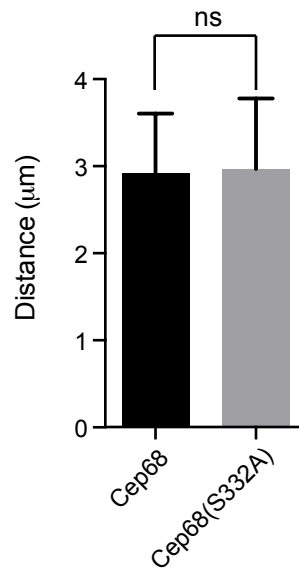

**a**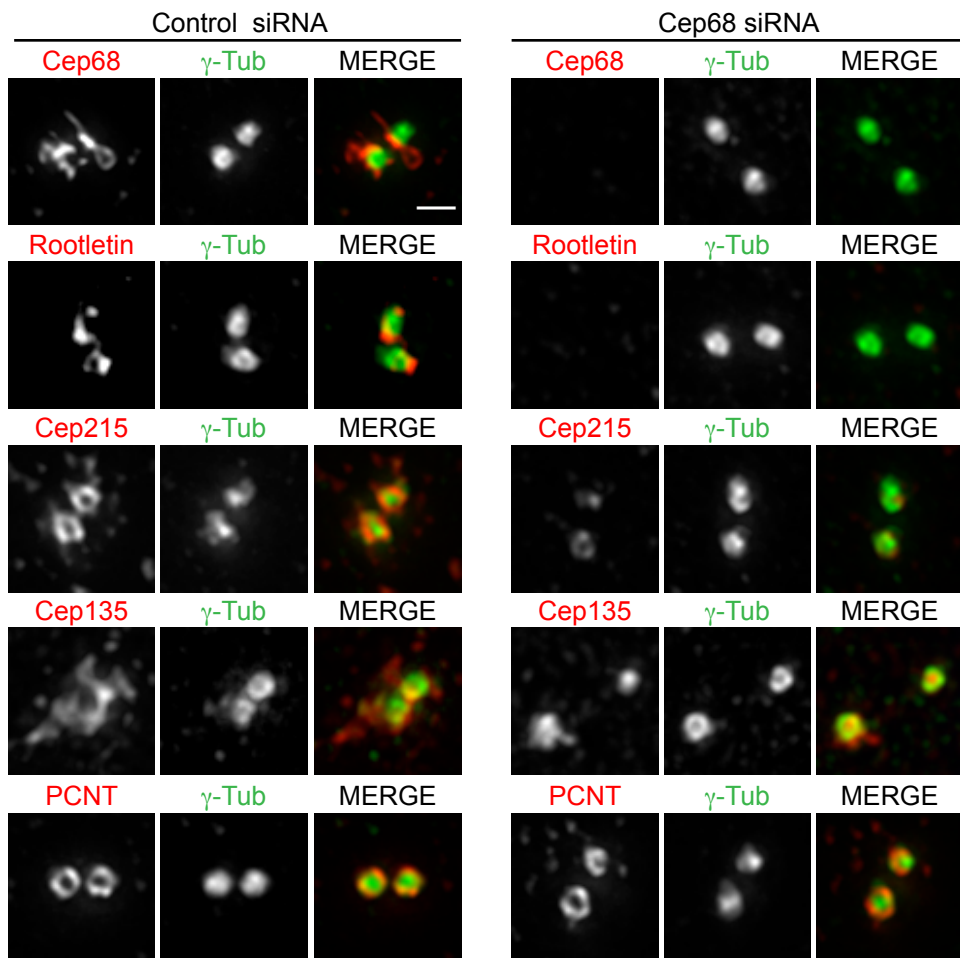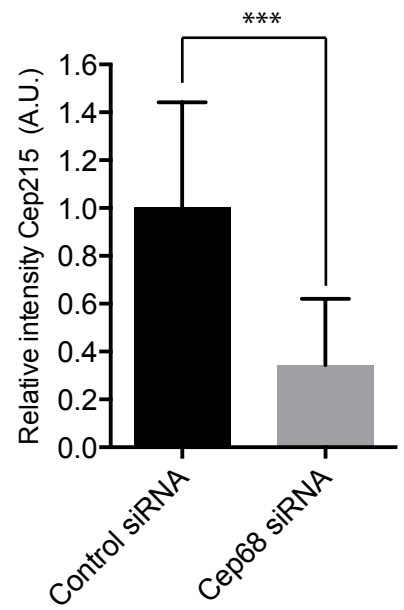**b**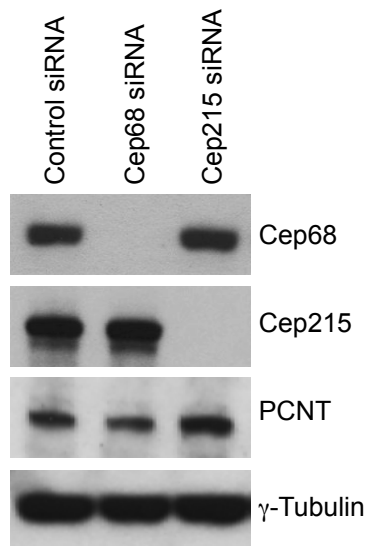



**a**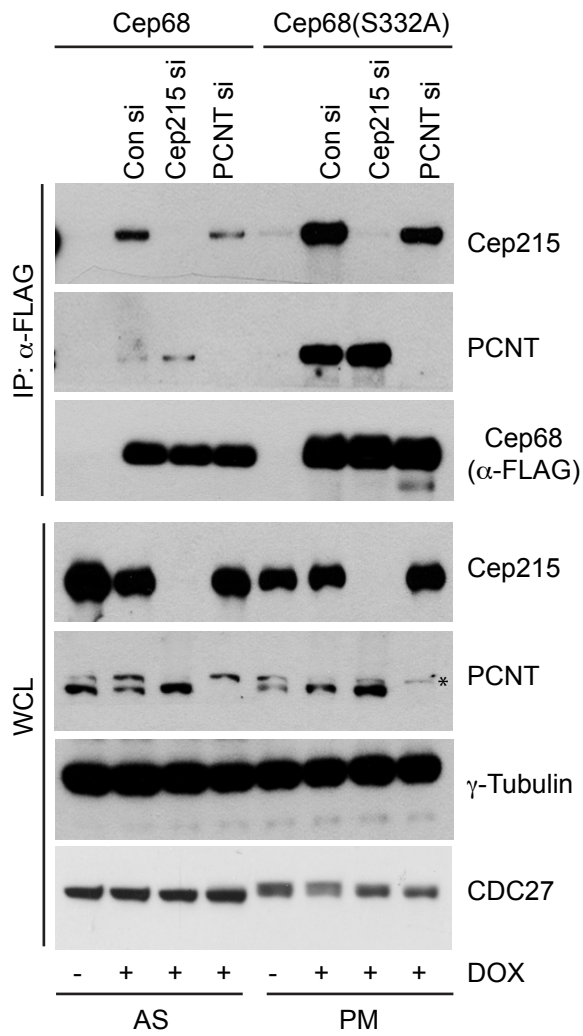**b**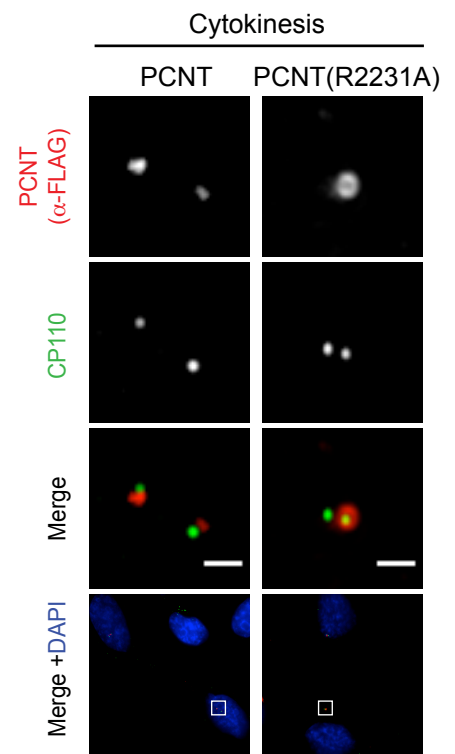

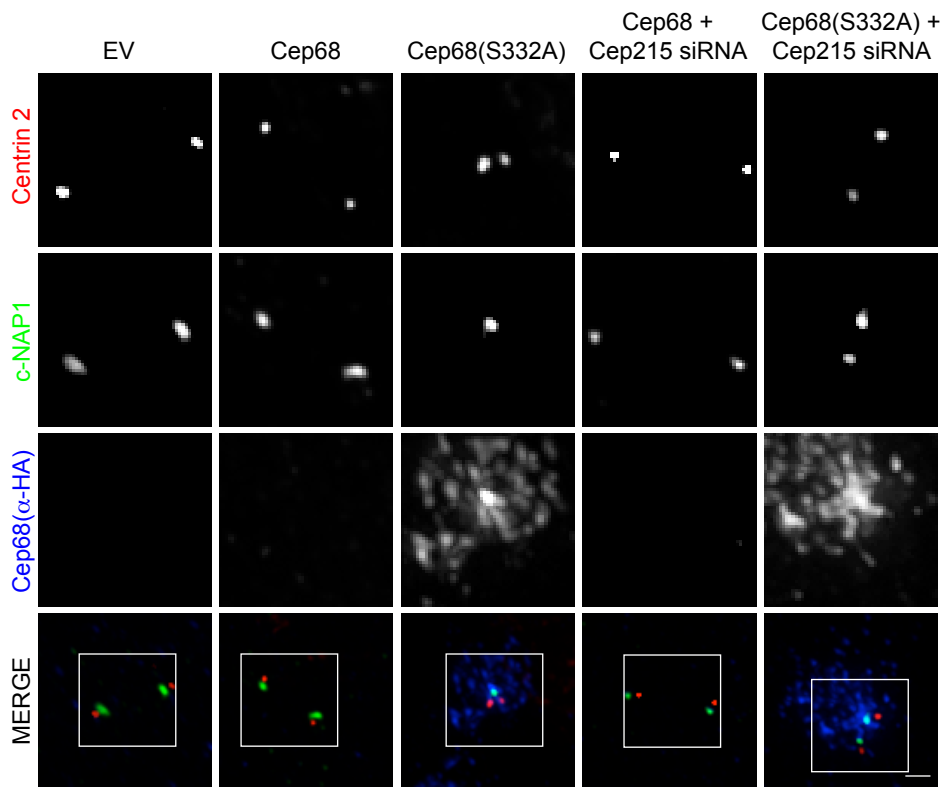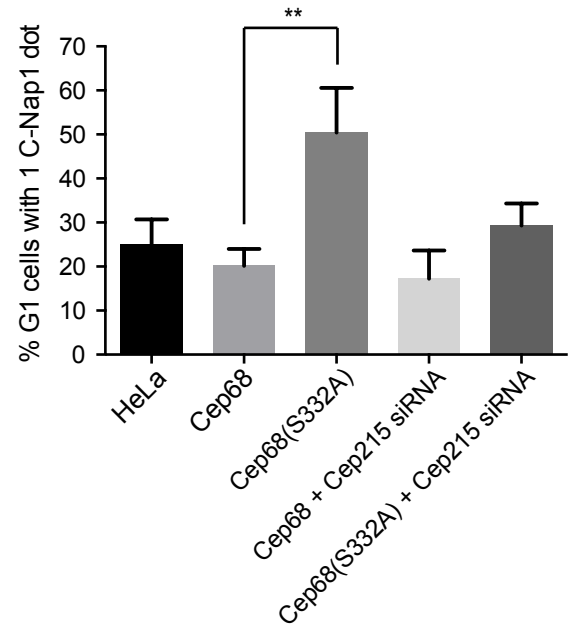

Supplement: NIHMS681301-supplement-supplement.pdf [file NIHMS681301-supplement-supplement.pdf]
